# Supplementary material for: Thirty-eight years of CO 2 fertilization have outpaced growing aridity to drive greening of Australian woody ecosystems
Source: Copernicus journal article supplement (doi:10.5194/bg-2021-218), 2021-08-23
Supplement: Supplementary file [file bg-2021-218-AC1-supplement.pdf]

**Referee 1 comments:**

**This is an important paper and is a novel and interesting analysis of the magnitude of the CO<sub>2</sub> fertilisation effect on changes to green cover despite drought, fire and LUC across the forests of eastern Australia. It was well written and uses a statistical approach (as opposed to a ecosystem model) to separate the relative impact of drought on the CO<sub>2</sub> fertilisation. Clever analysis, novel presentation of results (eg Figure 1) and was very well written.**

**The only issue I had was with the coarse resolution remote sensing product that was used to determine cover change.**

**L50 The Landsat based green vegetation fractional cover product (GV) is potentially superior to NDVI and I am wondering why this was not used. Monthly data are available from GeoSci Australia's data cube at 25 m resolution and is derived from Landsat 5 TM, ETM and OLI from 1987 onwards and are geometrically corrected, converted to surface reflectance, adjusted for solar illumination and viewing angles and masked for cloud and cloud shadow (see Lewis et al 2017, Gill et al 2017). The data are 'analysis ready' and this product is likely too be superior to NDVI and includes fractional bare soil and non-photosynthetic cover ideal for the analysis of drought impacts. Earlier imagery could be used to get back to 1982.**

**The fractional cover is at a far higher resolution (~25 m) and is a sub-pixel fraction and provides a finer-grained information than NDVI. NDVI is sensitive to saturation at the high cover, and is sensitive to variation in vegetation structure (i.e., bare ground), differences in canopy openness and complex seasonality associated with overstorey and understorey veg components. The fractional cover product also avoids dealing with both the AVHRR NDVI and MODIS NDVI data.**

*\* We used the coarser resolution product of AVHRR because it was a closer match to the spatial resolution of the AWAP climate data (~0.05°). It is also unclear how the fractional cover would respond to closed-canopy forest where the fractional cover might be expected to be saturated. We caution that there might be several separate issues regarding differences and degradations with the Landsat multispectral sensors. For example, Landsat 7's ETM+ had a well known malfunction that caused striping, Landsat 5, 7, and 8 have different radiometric resolution, and Landsat 5's TM sensor experienced decay and the platform's solar zenith angle increased during the later years of Landsat 5's 25+ year mission. This opens up various unknowns, and while this would be an interesting dimension to the question of the CO<sub>2</sub> effect, it would necessitate a separate piece of work.*

**The Discussion was excellent and drew the threads together well, and highlighted the notion that examining response of Australian vegetation will be helpful for other assessing impacts from other vegetation systems globally. While Australian focused, the approach and outcomes is of global significance.**

**So accept subject to consideration of using fractional cover. The next study could be useful to look at potential decrease in understory vegetation as overstory thickens. This has implication for productivity and biodiversity.**

*\* We agree the Geosci Australia fractional cover product would be ideal for future studies and we acknowledge the fractional cover would be a useful way to more resolutely identify shifts in vegetation cover. However we have not provided the requested analysis because the fractional cover data is more than 160x times the resolution, very large (100+ GB), and well beyond our capacity to process in due time for meeting the response deadline of the journal. Moreover this work is part of the lead author's postdoc for the last two years, and unfortunately cannot allocated the months necessary to re-do the analysis with the Geosci Australia Fractional Cover product because he is starting a new postdoc on a different topic.*

*We acknowledge the utility of fractional cover in the discussion for 'future work' in section 4.6 Vegetation composition shifts, with the following text:*

*"Future work may seek to uncover trends in the green vegetation fraction by analyzing higher resolution data derived from the Landsat constellation, such as Geoscience Australia's vegetation fractional cover product (Gill et al., 2017)."*
